# Supplementary material for: Mentha spp. Essential Oils: A Potential Toxic Fumigant with Inhibition of Acetylcholinesterase Activity on Reticulitermes dabieshanensis
Source: MDPI journal article supplement (doi:10.3390/plants12234034), 2023-11-30
Supplement: s1 [file s1]

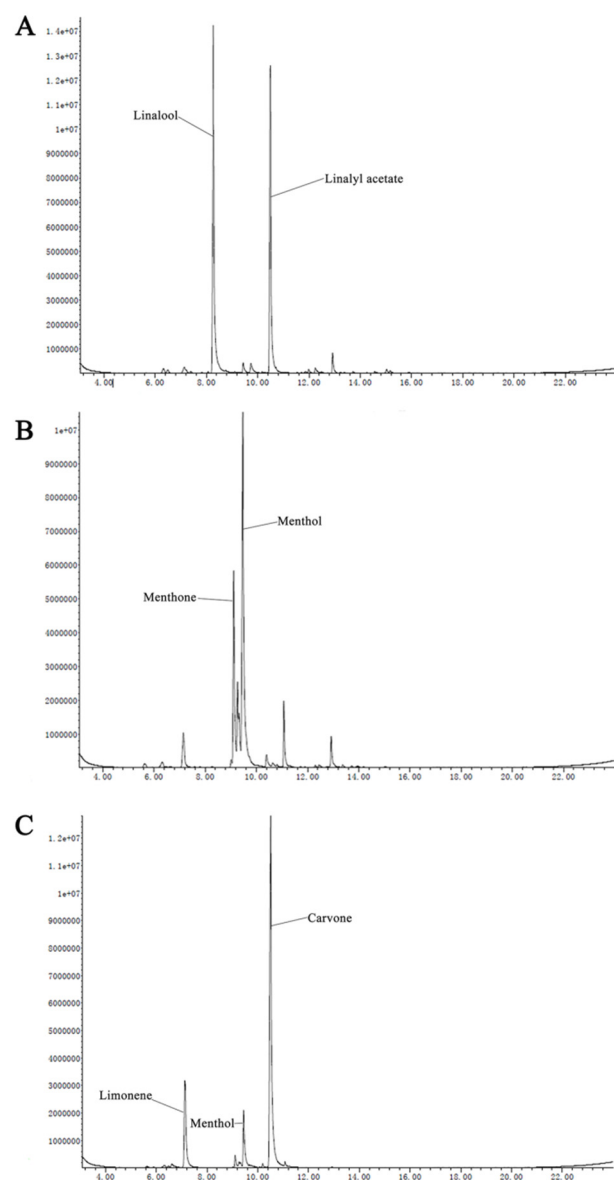

Figure S1. Gas chromatogram of the essential oils from *Mentha citrata* (A), *Mentha Piperita* (B) and *Mentha spicata* (C).
